# Supplementary material for: Chlorine redox chemistry is widespread in microbiology
Source: PubMed Central journal article supplement (PMC9751292; doi:10.1038/s41396-022-01317-5), 2022-10-06
Supplement: 41396_2022_1317_MOESM2_ESM.pdf [file 41396_2022_1317_MOESM2_ESM.pdf]

SupplementaryTable-1

| Phylum                | Organism                               | Oxygen Requirement  | Isolation Source                          | Environment Type                           | Genome Accession | Reference (DOI/Biosample)     |
|-----------------------|----------------------------------------|---------------------|-------------------------------------------|--------------------------------------------|------------------|-------------------------------|
| <b>Actinobacteria</b> | Modestobacter sp. DSM 44400            | Unspecified aerobe  | Yellow mineral on sandstone in Antarctica | Surface rock                               | GCF_900107175.1  | SAMN05661080                  |
| <b>Bacteroidetes</b>  | Algoriphagus sp. DSL-12                | Obligate aerobe     | Seawater at junction with freshwater lake | Seawater                                   | GCF_003259255.1  | 10.1007/s10482-019-01280-w    |
| <b>Bacteroidetes</b>  | Hymenobacter roseosalivarius DSM 11622 | Obligate aerobe     | Sediment from Antarctic Dry Valleys       | Terrestrial sediment                       | GCF_900176135.1  | 10.1016/S0723-2020(98)80047-7 |
| <b>Chlorophyta</b>    | Monoraphidium neglectum                | Oxygenic phototroph | Freshwater                                | Surface freshwater (phototroph-associated) | GCF_000611645.1  | 10.1186/1471-2164-14-926      |
| <b>Cyanobacteria</b>  | Anabaena cylindrica PCC 7122           | Obligate aerobe     | Pond water                                | Surface freshwater                         | GCF_000317695.1  | 10.1099/00221287-111-1-1      |
| <b>Cyanobacteria</b>  | Neosynechococcus sphagnicola sy1       | Unspecified aerobe  | Endophyte of Sphagnum in peat bog         | Surface freshwater (phototroph-associated) | GCF_000775285.1  | 10.11646/phytotaxa.170.1.3    |
| <b>Proteobacteria</b> | Acinetobacter baumannii OIFC074        | Obligate aerobe     | Clinical isolate                          | Animal host-associated                     | GCF_000305215.1  | 10.1186/s13059-015-0701-6     |
| <b>Proteobacteria</b> | Brevundimonas bacteroides DSM 4726     | Obligate aerobe     | Freshwater                                | Surface freshwater                         | GCF_000701445.1  | 10.1128/br.28.3.231-295.1964  |
| <b>Proteobacteria</b> | Brevundimonas sp. AAP58                | Obligate aerobe     | Freshwater lake                           | Surface freshwater                         | GCF_001295975.1  | SAMN02927139                  |
| <b>Proteobacteria</b> | Elstera litoralis                      | Unspecified aerobe  | Enriched from lake diatom biofilm         | Surface freshwater (phototroph-associated) | GCF_000963705.1  | 10.1099/ijis.0.026609-0       |
| <b>Proteobacteria</b> | Nitrosomonas mobilis                   | Unspecified aerobe  | Nitrifying granules                       | Built environment                          | GCF_900103035.1  | 10.3389/fmicb.2016.01869      |
| <b>Proteobacteria</b> | Novosphingobium sp. AAP93              | Obligate aerobe     | Freshwater lake                           | Surface freshwater                         | GCF_001296055.1  | SAMN02927144                  |
| <b>Proteobacteria</b> | Novosphingobium sp. NDB2Meth1          | Obligate aerobe     | Coal seam gas extraction bore well        | Deep subsurface                            | GCF_900117425.1  | SAMEA4535142                  |
| <b>Proteobacteria</b> | Porphyrobacter colymbi                 | Unspecified aerobe  | Chlorinated swimming pool water           | Built environment                          | GCF_002155685.1  | 10.2323/jgam.59.245           |
| <b>Proteobacteria</b> | Porphyrobacter sp. CACIAM 03H1         | Unspecified aerobe  | Culture of Microcystis aeruginosa         | Surface freshwater (phototroph-associated) | GCF_002215495.1  | 10.1128/genomeA.01069-17      |
| <b>Proteobacteria</b> | Sandarakinorhabdus cyanobacteriorum    | Unspecified aerobe  | Aggregates of cyanobacteria in a lake     | Surface freshwater (phototroph-associated) | GCF_002251755.1  | 10.1099/ijsem.0.002571        |
| <b>Proteobacteria</b> | Sandarakinorhabdus sp. AAP62           | Unspecified aerobe  | Surface water of freshwater lake          | Surface freshwater                         | GCF_000331225.1  | 10.1128/genomeA.00034-13      |
| <b>Proteobacteria</b> | Erythrobacteraceae bacterium CCH12-C2  | Unspecified aerobe  | Showerhead biofilm                        | Built environment                          | GCF_001556995.1  | 10.1128/AEM.03529-15          |
| <b>Proteobacteria</b> | Sphingomonas sp. CCH13-B11             | Unspecified aerobe  | Showerhead biofilm                        | Built environment                          | GCF_001557105.1  | 10.1128/AEM.03529-15          |
| <b>Proteobacteria</b> | Sphingomonas sp. CCH15-F11             | Unspecified aerobe  | Showerhead biofilm                        | Built environment                          | GCF_001557005.1  | 10.1128/AEM.03529-15          |
| <b>Proteobacteria</b> | Sphingomonas sp. CCH16-B10             | Unspecified aerobe  | Showerhead biofilm                        | Built environment                          | GCF_001556095.1  | 10.1128/AEM.03529-15          |
| <b>Proteobacteria</b> | Sphingomonas sp. CCH18-H6              | Unspecified aerobe  | Showerhead biofilm                        | Built environment                          | GCF_001557405.1  | 10.1128/AEM.03529-15          |
| <b>Proteobacteria</b> | Sphingomonas sp. CCH19-C6              | Unspecified aerobe  | Showerhead biofilm                        | Built environment                          | GCF_001556975.1  | 10.1128/AEM.03529-15          |
| <b>Proteobacteria</b> | Sphingomonas sp. CCH20-B6              | Unspecified aerobe  | Showerhead biofilm                        | Built environment                          | GCF_001556565.1  | 10.1128/AEM.03529-15          |
| <b>Proteobacteria</b> | Sphingomonas sp. CCH21-G11             | Unspecified aerobe  | Showerhead biofilm                        | Built environment                          | GCF_001555965.1  | 10.1128/AEM.03529-15          |
| <b>Proteobacteria</b> | Sphingomonas sp. CCH5-A5               | Unspecified aerobe  | Showerhead biofilm                        | Built environment                          | GCF_001555785.1  | 10.1128/AEM.03529-15          |
| <b>Proteobacteria</b> | Porphyrobacter donghaensis             | Unspecified aerobe  | Showerhead biofilm                        | Built environment                          | GCF_001556715.1  | 10.1128/AEM.03529-15          |
| <b>Spirochaetes</b>   | Leptospira ryugenii                    | Obligate aerobe     | Surface water from a garden               | Surface freshwater                         | GCF_003114855.1  | 10.1111/1348-0421.12671       |
